# Supplementary material for: Recyclable magnetic NiFe2O4/C yolk–shell nanospheres with excellent visible-light-Fenton degradation performance of tetracycline hydrochloride
Source: Royal Society of Chemistry journal article supplement (doi:10.1039/c9dt00396g), 2019-01-01
Supplement: c9dt00396g1.pdf [file c9dt00396g1.pdf]

**Recyclable magnetic NiFe<sub>2</sub>O<sub>4</sub>/C yolk-shell  
nanospheres with excellent visible-light-Fenton  
degradation performance of tetracycline  
hydrochloride**

Zhe Chen<sup>a</sup>, Yuting Gao<sup>a</sup>, Dongzhao mu<sup>a</sup>, Hongfei Shi<sup>a\*</sup>, Dawei Lou<sup>a\*</sup> and Shu-yuan  
Liu<sup>b\*</sup>

<sup>a</sup>School of Material Science and Technology, Jilin Institute of Chemical Technology,  
Jinlin 132022, P. R. China

<sup>b</sup>Department of pharmacology, Shenyang Medical College, Shenyang, 110034, PR  
China

## Materials

All analytical reagents were obtained from Sinopharm Chemical Reagent Co., Ltd. (Shanghai, China) and they were used without further purification.

### Preparation of PAA-NH<sub>4</sub> nanospheres

In a 1000 mL flask, 1 mL of PAA (0.2g/ mL) and 1 mL of NH<sub>3</sub>·H<sub>2</sub>O were firstly added to 100 mL of deionized water under magnetic stirring for 30 min. Then, 400 mL of isopropyl alcohol was slowly dropped into the above solution. Finally, a milk-white color of PAA-NH<sub>4</sub> nanosphere solution was obtained, which was stored at room temperature for further experiments.

### Preparation of NiFe<sub>2</sub>O<sub>4</sub>/C nanospheres

Briefly, different amount of FeCl<sub>2</sub>·4H<sub>2</sub>O (1, 1.5, 3mmol) and NiCl<sub>2</sub>·4H<sub>2</sub>O (0.5, 0.75, 1.5mmol) were respectively dissolved into the as-prepared PAA-NH<sub>4</sub> solution under vigorous stirring for 12 h. The resulting suspension was centrifuged at 6000 rpm for 10 min to separate the solid, and then washed with deionized water for several times. Subsequently, the solid sample was dried for 12 h in O<sub>2</sub> atmosphere at 60 °C for 10 h. Finally, the as-prepared sample was heated at 400 °C for 2 h with a rate of 2 °C min<sup>-1</sup> in N<sub>2</sub> atmosphere and then cooled to room temperature. The as-obtained samples with different content of Fe<sup>2+</sup> and Ni<sup>2+</sup> cations in the raw materials were labeled as (0.5:1) NiFe<sub>2</sub>O<sub>4</sub>/C, (0.75:1.5) NiFe<sub>2</sub>O<sub>4</sub>/C and (1.5:3) NiFe<sub>2</sub>O<sub>4</sub>/C, respectively. The pure NiFe<sub>2</sub>O<sub>4</sub> was prepared without the addition of PAA-NH<sub>4</sub> nanospheres.

### Characterization

X-ray diffraction (XRD) measurements were carried out by an X-ray powder diffractometer (Rigaku, Japan) equipped with a Cu K $\alpha$  source ( $\lambda = 0.15418$  nm). X-ray photoelectron spectroscopy (XPS) was performed using a JEOL2010F instrument. The morphologies and microstructures of the samples were observed by scanning electron microscopy (SEM; S-4800, Hitachi), transmission electron microscopy (TEM) and high-resolution transmission electron microscopy (HRTEM; JEM-2100, Japan). The Brunauer-Emmett-Teller (BET) specific surface areas (SBET) of the samples were measured through nitrogen adsorption by Micromeritics (ASAP 2020M, USA). UV-Vis diffuse reflectance spectra were obtained using UV-3600 UV-Vis spectrophotometer.

### Photocatalytic Performance Measurements

The photocatalytic activities of the obtained samples were evaluated by the degradation of tetracycline hydrochloride in the presence of H<sub>2</sub>O<sub>2</sub> under visible-light irradiation supplied by an 800 W Xe-lamp (Phchem III, Beijing NBET Technology Co., Ltd,  $\lambda > 420$  nm). Typically, 5 mg of as-obtained sample was dispersed in 50 mL of TC (20 mg/L) solution. Before light irradiation, the suspensions were magnetically stirred for 30 min in darkness to ensure the establishment of an adsorption-desorption equilibrium, and then a certain amount of 30 wt% of H<sub>2</sub>O<sub>2</sub> was added to the above suspensions. During the photocatalytic test, 3 mL of the suspension was taken out every 10 min and magnetically separated to remove the catalyst completely. The concentration of TC was measured by a UV-Vis spectrophotometer (UV-3600, Shimadzu) at  $\lambda_{\text{max}} = 357$  nm. The catalytic activities were calculated by the formula  $E = C_0 - C_t / C_0 \times 100\%$ , where  $C_0$  and  $C_t$  represent the adsorption equilibrium absorbance of TC and the desired time intervals, respectively. To detect the major active species in the photo Fenton-like process, radical-trapping experiments were conducted. The hydroxyl radical ( $\cdot\text{OH}$ ) scavenger, superoxide anion radical ( $\cdot\text{O}_2^-$ ), and hole ( $\text{h}^+$ ) scavenger can usually be trapped by isopropanol (IPA), 4-hydroxy-TEMPO, and triethanolamine (TEOA), respectively. Typically, different scavengers were dispersed into the suspension solutions before the photocatalytic tests, and the following procedure was similar to the TC degradation process.

**Table 1. The corresponding physicochemical properties of as-prepared samples**

| Sample                              | Average crystal size [nm]<br>(standard deviation) | $S_{\text{BET}}$<br>[m <sup>2</sup> g <sup>-1</sup> ] | Pore volume<br>[cm <sup>3</sup> g <sup>-1</sup> ] |
|-------------------------------------|---------------------------------------------------|-------------------------------------------------------|---------------------------------------------------|
| NiFe <sub>2</sub> O <sub>4</sub>    | 21.32                                             | 22.59                                                 | 0.12                                              |
| NiFe <sub>2</sub> O <sub>4</sub> /C | 10.27                                             | 72.23                                                 | 0.17                                              |

**Table 2. The comparison of TC degradation activity of NiFe<sub>2</sub>O<sub>4</sub>/C with previous literatures**

| Photocatalyst                            | Concentration<br>(mg L <sup>-1</sup> ) | Dosage<br>(g L <sup>-1</sup> ) | Time<br>(min) | Removal<br>(%) | Light source                         | Reference |
|------------------------------------------|----------------------------------------|--------------------------------|---------------|----------------|--------------------------------------|-----------|
| 2.5% Ag/AgIn <sub>5</sub> S <sub>8</sub> | 10                                     | 0.3                            | 120           | 95.3           | 300 W Xe lamp;<br>$\lambda > 400$ nm | 1         |
| 10% Ag@AgI/V <sub>1</sub> -<br>BOI       | 20                                     | 0.3                            | 60            | 86.40%         | 300 W Xe lamp;<br>$\lambda > 420$ nm | 2         |
| Au-TiO <sub>2</sub> /pDA/PVDF            | 10                                     | —                              | 120           | 92             | 300 W Xe lamp;<br>$\lambda > 420$ nm | 3         |
| N-TiO <sub>2</sub> /rGO                  | 10                                     | 1.0                            | 60            | 98             | 300 W Xe lamp;                       | 4         |

|                                         |    |     |     |       |                                         |           |
|-----------------------------------------|----|-----|-----|-------|-----------------------------------------|-----------|
|                                         |    |     |     |       | $\lambda > 400$ nm                      |           |
| N-CNT/mpg-C <sub>3</sub> N <sub>4</sub> | 20 | 1.0 | 240 | 67.1  | 300 W Xe lamp;<br>$\lambda \geq 400$ nm | 5         |
| CQDs/g-C <sub>3</sub> N <sub>4</sub>    | 10 | 0.5 | 240 | 78.6  | 250 W Xe lamp;<br>$\lambda > 420$ nm    | 6         |
| GQDs/mpg-C <sub>3</sub> N <sub>4</sub>  | 20 | 1.0 | 120 | 65    | 300 W Xe lamp;<br>$\lambda \geq 400$ nm | 7         |
| h-BN/g-C <sub>3</sub> N <sub>4</sub>    | 10 | 1.0 | 60  | 79.7  | 300 W Xe lamp;<br>$\lambda \geq 400$ nm | 8         |
| NiFe <sub>2</sub> O <sub>4</sub> /C     | 20 | 0.1 | 60  | 97.25 | 800 W Xe lamp;<br>$\lambda \geq 400$ nm | This work |

## References

- (1) F. Deng, L. Zhao, X. Luo, S. Luo, D.D. Dionysiou, *Chem. Eng. J.*, 2017, **333**, 423-433.
- (2) Y. Yang, Z. Zeng, C. Zhang, D. Huang, G. Zeng, R. Xiao, C. Lai, C. Zhou, H. Guo, W. Xue, M. Cheng, W. Wang, J. Wang, *Chem. Eng. J.*, 2018, **349**, 808-821.
- (3) C. Wang, Y.L. Wu, J. Lu, J. Zhao, J.Y. Cui, X.L. Wu, Y.S. Yan, P.W. Huo, *ACS Appl. Mater. Interfaces*, 2017, **9**, 23687-23697.
- (4) X.D. Tang, Z.G. Wang, Y. Wang, *Chem. Phys. Lett.*, 2018, **691**, 408-414.
- (5) J.Y. Liu, Y.H. Song, H. Xu, X.W. Zhu, J.B. Lian, Y.G. Xu, Y. Zhao, L.Y. Huang, H.Y. Ji, H.M. Li, *J. Colloid Interface Sci.*, 2017, **494**, 38-46.
- (6) Y.Z. Hong, Y.D. Meng, G.Y. Zhang, B.X. Yin, Y. Zhao, W.D. Shi, C.S. Li, *Sep. Purif. Technol.*, 2016, **171**, 229-237.
- (7) J.Y. Liu, H. Xu, Y.G. Xu, Y.H. Song, J.B. Lian, Y. Zhao, L. Wang, L.Y. Huang, H.Y. Ji, H.M. Li, *Appl. Catal. B: Environ.*, 2017, **207**, 429-437.
- (8) L.B. Jiang, X.Z. Yuan, G.M. Zeng, Z.B. Wu, J. Liang, X.H. Chen, L.J. Leng, H. Wang, H. Wang, *Appl. Catal. B: Environ.*, 2018, **221**, 715-725.
